# Supplementary material for: Valorization of Citrus reticulata Blanco Peels to Produce Enriched Wheat Bread: Phenolic Bioaccessibility and Antioxidant Potential
Source: MDPI journal article supplement (doi:10.3390/antiox12091742), 2023-09-08
Supplement: s1 [file s1]

**Table S1.** Analytical parameters, retention time and mass spectral data for the identification and quantification of phenolic compounds using cLC-ESI-MS method.

| Compound                   | Retention time, min | Precursor Ion [M-H] <sup>-</sup> ( <i>m/z</i> ) ( <i>Fragmentor</i> , eV) | Linear range, µg·L <sup>-1</sup> (n) | LOD, µg·L <sup>-1</sup> | LOQ, µg·L <sup>-1</sup> | Calibration equation, $y = ax + b$ |                        |                       | Intra-day precision |          | Inter-day precision |          |
|----------------------------|---------------------|---------------------------------------------------------------------------|--------------------------------------|-------------------------|-------------------------|------------------------------------|------------------------|-----------------------|---------------------|----------|---------------------|----------|
|                            |                     |                                                                           |                                      |                         |                         |                                    |                        |                       | RSD, % (n=3)        |          | RSD, % (N=9)        |          |
|                            |                     |                                                                           |                                      |                         |                         | <i>a</i> , L·µg <sup>-1</sup>      | <i>b</i>               | <i>R</i> <sup>2</sup> | Area                | <i>k</i> | Area                | <i>k</i> |
| Gallic acid                | 3.6                 | 169.0 (70)                                                                | 10-250 (6)                           | 2.0                     | 7.0                     | $(5.7 \pm 0.1) \cdot 10^2$         | $(0 \pm 1) \cdot 10^3$ | 0.9988                | 4.0                 | 4.8      | 5.9                 | 4.3      |
| DHB <sup>1</sup>           | 4.9                 | 153.0 (70)                                                                | 20-250 (5)                           | 6.0                     | 20                      | $(8.5 \pm 0.3) \cdot 10^2$         | $(0 \pm 4) \cdot 10^3$ | 0.9971                | 5.7                 | 3.0      | 6.1                 | 5.4      |
| Catechin                   | 9.9                 | 289.1 (150)                                                               | 240-600 (5)                          | 100                     | 333                     | $(4.7 \pm 0.3) \cdot 10^2$         | $(0 \pm 1) \cdot 10^4$ | 0.9905                | 3.4                 | 2.2      | 4.3                 | 6.0      |
| Caffeic acid               | 11.8                | 179.0 (150)                                                               | 16-80 (5)                            | 4.0                     | 13                      | $(1.76 \pm 0.08) \cdot 10^3$       | $(0 \pm 4) \cdot 10^3$ | 0.9932                | 5.1                 | 1.0      | 3.9                 | 2.7      |
| <i>p</i> -Coumaric acid    | 14.5                | 163.0 (70)                                                                | 2-180 (8)                            | 0.5                     | 1.7                     | $(2.30 \pm 0.05) \cdot 10^3$       | $(0 \pm 4) \cdot 10^3$ | 0.9973                | 1.6                 | 0.4      | 3.0                 | 1.4      |
| <i>trans</i> -Ferulic acid | 15.4                | 193.2 (70)                                                                | 16-80 (5)                            | 4.0                     | 13                      | $(2.05 \pm 0.07) \cdot 10^3$       | $(0 \pm 4) \cdot 10^3$ | 0.9961                | 6.1                 | 0.3      | 7.8                 | 0.7      |
| Resveratrol                | 18.5                | 227.1 (150)                                                               | 1-150 (8)                            | 0.3                     | 1.0                     | $(7.3 \pm 0.2) \cdot 10^2$         | $(0 \pm 1) \cdot 10^3$ | 0.9969                | 6.3                 | 0.3      | 4.8                 | 0.7      |
| Quercetin                  | 19.7                | 301.0 (150)                                                               | 1-150 (8)                            | 0.3                     | 1.0                     | $(7.4 \pm 0.2) \cdot 10^2$         | $(0 \pm 1) \cdot 10^3$ | 0.9977                | 3.6                 | 0.3      | 5.4                 | 1.2      |
| Kaempferol                 | 22.7                | 285.0 (150)                                                               | 0.5-150 (9)                          | 0.1                     | 0.3                     | $(1.55 \pm 0.05) \cdot 10^3$       | $(9 \pm 3) \cdot 10^3$ | 0.9931                | 4.4                 | 0.4      | 4.2                 | 1.0      |

<sup>1</sup>DHB: Dihydroxybenzoic acid

**Table S2.** Analytical parameters, retention time, molecular formula and mass spectral data for the identification and quantification of phenolic compounds using HPLC-ESI-QTOF method.

| Compound                   | Retention time (min) | Molecular formula                               | Precursor Ion [M-H] <sup>-</sup> ( <i>m/z</i> )<br>( <i>Fragmentor</i> , 125 eV) | Linear range, $\mu\text{g}\cdot\text{L}^{-1}$ | LOD, $\mu\text{g}\cdot\text{L}^{-1}$ | LOQ, $\mu\text{g}\cdot\text{L}^{-1}$ | Calibration equation, $y = ax + b$         |                         |                       |
|----------------------------|----------------------|-------------------------------------------------|----------------------------------------------------------------------------------|-----------------------------------------------|--------------------------------------|--------------------------------------|--------------------------------------------|-------------------------|-----------------------|
|                            |                      |                                                 |                                                                                  |                                               |                                      |                                      | <i>a</i> , $\text{L}\cdot\mu\text{g}^{-1}$ | <i>b</i>                | <i>R</i> <sup>2</sup> |
| Gallic acid                | 2.9                  | C <sub>7</sub> H <sub>6</sub> O <sub>5</sub>    | 169.0142                                                                         | 20-2000                                       | 8.6                                  | 28.7                                 | $(1.7 \pm 0.1) \cdot 10^7$                 | $(1 \pm 1) \cdot 10^6$  | 0.9962                |
| Dihydroxybenzoic acid      | 5.0                  | C <sub>7</sub> H <sub>6</sub> O <sub>4</sub>    | 153.0557                                                                         | 2-2000                                        | 1.1                                  | 3.7                                  | $(1.859 \pm 0.004) \cdot 10^7$             | $(0 \pm 40) \cdot 10^3$ | 0.9999                |
| Catechin                   | 7.5                  | C <sub>15</sub> H <sub>14</sub> O <sub>6</sub>  | 289.0718                                                                         | 2-2000                                        | 0.9                                  | 3.0                                  | $(1.62 \pm 0.01) \cdot 10^7$               | $(0 \pm 13) \cdot 10^3$ | 0.9999                |
| Caffeic acid               | 9.4                  | C <sub>9</sub> H <sub>8</sub> O <sub>4</sub>    | 179.0350                                                                         | 2-2000                                        | 2.5                                  | 8.3                                  | $(2.98 \pm 0.07) \cdot 10^7$               | $(8 \pm 7) \cdot 10^5$  | 0.9990                |
| Epicatequina               | 9.6                  | C <sub>15</sub> H <sub>14</sub> O <sub>6</sub>  | 289.0718                                                                         | 2-2000                                        | 0.8                                  | 2.7                                  | $(1.31 \pm 0.02) \cdot 10^7$               | $(2 \pm 2) \cdot 10^5$  | 0.9996                |
| <i>p</i> -Coumaric acid    | 13.5                 | C <sub>9</sub> H <sub>8</sub> O <sub>3</sub>    | 163.0401                                                                         | 2-2000                                        | 1.1                                  | 3.7                                  | $(1.70 \pm 0.07) \cdot 10^7$               | $(8 \pm 7) \cdot 10^5$  | 0.9964                |
| Rutin                      | 14.7                 | C <sub>27</sub> H <sub>30</sub> O <sub>16</sub> | 609.1461                                                                         | 2-2000                                        | 2.0                                  | 6.7                                  | $(2.23 \pm 0.02) \cdot 10^7$               | $(0 \pm 2) \cdot 10^5$  | 0.9998                |
| <i>trans</i> -Ferulic acid | 14.9                 | C <sub>10</sub> H <sub>10</sub> O <sub>4</sub>  | 193.0506                                                                         | 2-2000                                        | 1.7                                  | 5.7                                  | $(5.4 \pm 0.1) \cdot 10^6$                 | $(1 \pm 1) \cdot 10^5$  | 0.9993                |
| Naringin                   | 17.4                 | C <sub>27</sub> H <sub>32</sub> O <sub>14</sub> | 579.1719                                                                         | 2-2000                                        | 0.8                                  | 2.7                                  | $(1.28 \pm 0.02) \cdot 10^7$               | $(2 \pm 2) \cdot 10^5$  | 0.9997                |
| Hesperidin                 | 17.8                 | C <sub>28</sub> H <sub>34</sub> O <sub>15</sub> | 609.1825                                                                         | 2-2000                                        | 0.3                                  | 1.0                                  | $(1.38 \pm 0.02) \cdot 10^7$               | $(3 \pm 2) \cdot 10^5$  | 0.9997                |
| Myricetin                  | 20.6                 | C <sub>15</sub> H <sub>10</sub> O <sub>8</sub>  | 317.0303                                                                         | 2-2000                                        | 1.7                                  | 5.7                                  | $(3.56 \pm 0.03) \cdot 10^7$               | $(0 \pm 3) \cdot 10^5$  | 0.9999                |
| Resveratrol                | 23.0                 | C <sub>14</sub> H <sub>12</sub> O <sub>3</sub>  | 227.0714                                                                         | 2-2000                                        | 1.1                                  | 3.7                                  | $(8.18 \pm 0.05) \cdot 10^7$               | $(5 \pm 5) \cdot 10^4$  | 0.9999                |
| Quercetin                  | 26.2                 | C <sub>15</sub> H <sub>10</sub> O <sub>7</sub>  | 301.0354                                                                         | 2-2000                                        | 0.9                                  | 3.0                                  | $(3.0 \pm 0.1) \cdot 10^7$                 | $(1 \pm 1) \cdot 10^6$  | 0.9962                |
| Kaempferol                 | 31.6                 | C <sub>15</sub> H <sub>10</sub> O <sub>6</sub>  | 285.0405                                                                         | 2-2000                                        | 1.4                                  | 4.7                                  | $(3.6 \pm 0.1) \cdot 10^7$                 | $(0 \pm 2) \cdot 10^6$  | 0.9965                |
